# Supplementary material for: Synthesis, Single Crystal X-ray Analysis, and Antifungal Profiling of Certain New Oximino Ethers Bearing Imidazole Nuclei
Source: MDPI journal article supplement (doi:10.3390/molecules22111895), 2017-11-03
Supplement: s1 [file s1]

# Synthesis, single crystal X-ray analysis and antifungal profiling of certain new oximino ethers bearing imidazole nuclei

Reem I. Al-Wabli<sup>1\*</sup>, Alwah R. Al-Ghamdi<sup>1</sup>, Hazem A. Ghabbour<sup>1,2</sup>, Mohamed H. Al-Agamy<sup>3,4</sup> and Mohamed I. Attia<sup>1,5\*</sup>

<sup>1</sup>Department of Pharmaceutical Chemistry, College of Pharmacy, King Saud University, P.O. Box 2457, Riyadh 11451, Saudi Arabia

<sup>2</sup>Department of Medicinal Chemistry, Faculty of Pharmacy, Mansoura University, Mansoura 35516, Egypt

<sup>3</sup>Department of Pharmaceutics, College of Pharmacy, King Saud University, P.O. Box 2457, Riyadh 11451,

Saudi Arabia; malagamy@ksu.edu.sa

<sup>4</sup>Microbiology and Immunology Department, Faculty of Pharmacy, Al-Azhar University, Cairo 11884, Egypt

<sup>5</sup>Medicinal and Pharmaceutical Chemistry Department, Pharmaceutical and Drug Industries Research Division, National Research Centre (ID: 60014618), El Bohooth Street, Dokki, Giza 12622, Egypt

**Table S1.** The X-ray experimental details of compound **Vi**.

| <b>Crystal data</b>                                                         |                                                                        |
|-----------------------------------------------------------------------------|------------------------------------------------------------------------|
| Chemical formula                                                            | C <sub>20</sub> H <sub>18</sub> BrN <sub>3</sub> O <sub>3</sub>        |
| Mr                                                                          | 428.28                                                                 |
| Crystal system, space group                                                 | Monoclinic, <i>P</i> 2 <sub>1</sub> / <i>c</i>                         |
| Temperature (K)                                                             | 293                                                                    |
| <i>a</i> , <i>b</i> , <i>c</i> (Å)                                          | 18.7879 (14), 5.8944 (4), 16.7621 (12)                                 |
| $\beta$ (°)                                                                 | 91.632 (2)                                                             |
| <i>V</i> (Å <sup>3</sup> )                                                  | 1855.5 (2)                                                             |
| <i>Z</i>                                                                    | 4                                                                      |
| Radiation type                                                              | Mo <i>K</i> α                                                          |
| $\mu$ (mm <sup>-1</sup> )                                                   | 2.24                                                                   |
| Crystal size (mm)                                                           | 0.33 × 0.28 × 0.08                                                     |
| <b>Data collection</b>                                                      |                                                                        |
| Diffractometer                                                              | Bruker APEX-II D8 venture diffractometer                               |
| Absorption correction                                                       | Multi-scan, SADABS Bruker 2014                                         |
| <i>T</i> <sub>min</sub> , <i>T</i> <sub>max</sub>                           | 0.528, 0.846                                                           |
| No. of measured, independent and observed [ $\geq 2\sigma(I)$ ] reflections | 35254, 3848, 2376                                                      |
| <i>R</i> <sub>int</sub>                                                     | 0.136                                                                  |
| <b>Refinement</b>                                                           |                                                                        |
| $R[F^2 > 2\sigma(F^2)]$ , $wR(F^2)$ , <i>S</i>                              | 0.048, 0.111, 1.02                                                     |
| No. of reflections                                                          | 3848                                                                   |
| No. of parameters                                                           | 244                                                                    |
| No. of restraints                                                           | 0                                                                      |
| H-atom treatment                                                            | H atoms treated by a mixture of independent and constrained refinement |
| $\Delta\rho_{\text{max}}$ , $\Delta\rho_{\text{min}}$ (e Å <sup>-3</sup> )  | 0.37, -0.43                                                            |
